# Supplementary material for: Comparative Study of Selected Excipients’ Influence on Carvedilol Release from Hypromellose Matrix Tablets
Source: MDPI journal article supplement (doi:10.3390/pharmaceutics15051525), 2023-05-18
Supplement: s1 [file s1]

**Table S1.** Experimental results of carvedilol release. Data is shown for PEG/PEO, PVP and mannitol groups. The results given are mean values with corresponding standard deviations shown in parentheses (n = 4).

| t [min] | Polyglykol®<br>4000 P | Polyglykol® 8000<br>P | POLYOX™ WSR<br>N-80 (LEO NF<br>Grade) | KOLLIDON®<br>25 | KOLLIDON® 90<br>F | C*Pharm<br>Mannidex 16700 | PEARLITOL®<br>160C | Parteck® M 100 | Parteck® M 200 |
|---------|-----------------------|-----------------------|---------------------------------------|-----------------|-------------------|---------------------------|--------------------|----------------|----------------|
| 10      | 17.1 (0.7)            | 12.4 (1.16)           | 1.9 (0.38)                            | 12.2 (2.44)     | 1.3 (0.34)        | 9.8 (1.47)                | 10.5 (1)           | 5.3 (0.65)     | 6.5 (0.41)     |
| 20      | 33.7 (2.8)            | 30 (1.57)             | 5.7 (1.01)                            | 25 (4.98)       | 3.2 (0.79)        | 15.6 (1.93)               | 16.5 (1.12)        | 17.4 (2.06)    | 17.3 (3.04)    |
| 30      | 46.9 (4.11)           | 45.4 (1.9)            | 10.5 (1.73)                           | 35.9 (7.05)     | 5.3 (1.39)        | 20.6 (2.37)               | 21.6 (1.2)         | 35.3 (12.06)   | 30.9 (11.31)   |
| 45      | 63.7 (6.87)           | 64.1 (2.01)           | 18.7 (2.28)                           | 49.7 (12.58)    | 8.5 (2.23)        | 33.6 (15.08)              | 28.7 (1.94)        | 55.3 (16.19)   | 48 (16.88)     |
| 60      | 76.1 (8.82)           | 77.8 (1.62)           | 27.2 (1.99)                           | 60 (19.45)      | 11.9 (3.15)       | 40.3 (17.66)              | 37.4 (6.6)         | 70.1 (12.52)   | 62.8 (16.02)   |
| 90      | 89.8 (7.8)            | 94.2 (1.28)           | 42.8 (1.55)                           | 72.1 (25.81)    | 19.1 (4.88)       | 50.2 (17.3)               | 54.5 (15.89)       | 86.3 (8.59)    | 79.8 (14.76)   |
| 120     | 91.8 (5.46)           | 96.4 (2.11)           | 56.4 (2.47)                           | 76.2 (23.86)    | 26.5 (6.25)       | 59.9 (16.42)              | 66.5 (17.39)       | 93.1 (6.6)     | 87 (11.68)     |
| 150     | 92.8 (4.33)           | 97 (1.4)              | 67.9 (3.5)                            | 79.2 (21.53)    | 34.1 (7.28)       | 69.6 (15.65)              | 75.4 (16.14)       | 97.1 (4.03)    | 91.7 (8.28)    |
| 180     | 93.6 (3.32)           | 97.2 (1.38)           | 77.2 (4.3)                            | 82.6 (18.62)    | 41.3 (7.63)       | 77.1 (14.25)              | 82.1 (14.36)       | 99.3 (2.55)    | 94.7 (5.75)    |
| 210     | 94.3 (2.48)           | 97.1 (1.37)           | 84.8 (4.46)                           | 85.4 (16.18)    | 48.7 (7.33)       | 83.7 (13.35)              | 87.4 (12.67)       | 101.2 (1.25)   | 97.6 (3.3)     |
| 240     | 94.9 (1.81)           | 97.2 (1.36)           | 91 (3.34)                             | 88.2 (14.23)    | 55.5 (7.1)        | 88.2 (10.12)              | 91.9 (10.93)       | 102.1 (0.69)   | 99 (1.19)      |
| 270     | 95.5 (1.19)           | 97.2 (1.34)           | 95.4 (2.2)                            | 90.6 (12.26)    | 61.7 (6.85)       | 91.8 (7.64)               | 95.1 (8.8)         | 102.1 (0.75)   | 99.7 (0.53)    |
| 300     | 95.8 (0.94)           | 97.1 (1.37)           | 97.2 (0.73)                           | 92.5 (10.26)    | 67.2 (6.68)       | 94.6 (5.62)               | 97.5 (6.99)        | 102.1 (0.75)   | 99.8 (0.63)    |
| 330     | 96.2 (0.84)           | 97.2 (1.36)           | 97.9 (0.84)                           | 94.3 (8.37)     | 72.4 (6.74)       | 97.2 (4.31)               | 99.3 (5.55)        | 102.2 (0.83)   | 99.9 (0.67)    |
| 360     | 96.3 (0.91)           | 97.1 (1.35)           | 98.1 (1.2)                            | 95.8 (6.73)     | 77 (6.86)         | 98.7 (3.11)               | 100.5 (4.37)       | 102.1 (0.86)   | 100 (0.65)     |
| 420     | 96.3 (1.02)           | 97.2 (1.31)           | 98.1 (1.23)                           | 98.2 (4.3)      | 85.1 (6.46)       | 100.7 (0.9)               | 102.9 (1.99)       | 102.2 (0.94)   | 100 (0.69)     |
| 480     | 96.3 (1.02)           | 97.1 (1.29)           | 98 (1.25)                             | 100.1 (3.01)    | 91.3 (5.31)       | 101 (0.47)                | 103.7 (1.22)       | 102.2 (0.99)   | 100.1 (0.66)   |
| 540     | 96.3 (1.07)           | 97.1 (1.25)           | 98 (1.26)                             | 101.3 (2.52)    | 95.9 (3.7)        | 101 (0.47)                | 104 (1.17)         | 102.2 (1.03)   | 100 (0.7)      |
| 600     | 96.3 (1.1)            | 97.1 (1.19)           | 98 (1.3)                              | 102.1 (2.62)    | 98 (1.92)         | 100.8 (0.46)              | 104.2 (1.2)        | 102.2 (1.06)   | 100.1 (0.66)   |
| 660     | 96.3 (1.16)           | 97.1 (1.17)           | 97.9 (1.28)                           | 102.4 (2.55)    | 99 (1.5)          | 100.8 (0.41)              | 104.4 (1.17)       | 102.3 (1.14)   | 100.1 (0.69)   |
| 720     | 96.1 (1.18)           | 97 (1.18)             | 97.9 (1.33)                           | 102.5 (2.6)     | 99.5 (2.17)       | 100.8 (0.42)              | 104.5 (1.19)       | 102.2 (1.26)   | 100.1 (0.66)   |
| 780     | 96.1 (1.24)           | 97 (1.16)             | 97.9 (1.37)                           | 102.6 (2.62)    | 99.6 (2.19)       | 100.6 (0.44)              | 104.7 (1.22)       | 102.2 (1.31)   | 100.2 (0.67)   |
| 840     | 96.1 (1.26)           | 96.9 (1.14)           | 97.8 (1.39)                           | 102.7 (2.62)    | 99.6 (2.21)       | 100.6 (0.41)              | 104.9 (1.27)       | 102.1 (1.38)   | 100.2 (0.68)   |
| 900     | 96 (1.28)             | 96.9 (1.07)           | 97.7 (1.43)                           | 102.9 (2.73)    | 99.6 (2.21)       | 100.6 (0.39)              | 105.1 (1.28)       | 102.1 (1.43)   | 100.1 (0.69)   |

---

|      |             |             |             |              |             |              |              |              |              |
|------|-------------|-------------|-------------|--------------|-------------|--------------|--------------|--------------|--------------|
| 960  | 96 (1.29)   | 96.9 (1.09) | 97.7 (1.44) | 102.9 (2.78) | 99.6 (2.22) | 100.5 (0.44) | 105.2 (1.32) | 102.1 (1.46) | 100.1 (0.69) |
| 1020 | 96 (1.34)   | 97 (1.19)   | 97.9 (1.28) | 103 (2.8)    | 99.7 (2.22) | 100.9 (0.63) | 105.4 (1.31) | 102.1 (1.44) | 100.2 (0.66) |
| 1080 | 95.9 (1.4)  | 97 (1.15)   | 97.8 (1.37) | 103.2 (2.85) | 99.7 (2.24) | 100.9 (0.69) | 105.7 (1.34) | 102.1 (1.33) | 100.2 (0.63) |
| 1140 | 95.8 (1.45) | 97 (1.19)   | 97.9 (1.31) | 103.3 (2.87) | 99.7 (2.21) | 100.7 (0.37) | 105.7 (1.41) | 102.1 (1.45) | 100.2 (0.69) |
| 1200 | 95.8 (1.51) | 97 (1.12)   | 97.9 (1.28) | 103.4 (2.93) | 99.7 (2.22) | 100.9 (0.6)  | 106 (1.45)   | 102.1 (1.3)  | 100.3 (0.69) |
| 1260 | 95.7 (1.49) | 96.9 (1.12) | 97.8 (1.44) | 103.5 (2.91) | 99.7 (2.22) | 100.7 (0.51) | 106.1 (1.49) | 102.1 (1.46) | 100.3 (0.69) |
| 1320 | 95.7 (1.58) | 97 (0.97)   | 98 (1.11)   | 103.3 (2.85) | 99.7 (2.23) | 100.8 (0.44) | 106 (1.41)   | 102.1 (1.35) | 100.3 (0.72) |
| 1380 | 95.8 (1.51) | 97 (1.17)   | 98 (1.29)   | 103.4 (3)    | 99.7 (2.3)  | 100.7 (0.37) | 106 (1.53)   | 102.1 (1.44) | 100.3 (0.7)  |
| 1440 | 95.7 (1.57) | 97 (0.96)   | 97.9 (1.4)  | 103.4 (2.82) | 99.8 (2.33) | 101 (0.58)   | 106 (1.36)   | 102.2 (1.3)  | 100.2 (0.71) |

---

**Table S2.** Experimental results of carvedilol release. Data is shown for the lactose group, sucrose and maltodextrin. The results given are mean values with corresponding standard deviations shown in parentheses (n = 4).

| t [min] | Lactochem®<br>Fine Powder | Lactochem®<br>Crystals | SuperTab®<br>11SD | FlowLac® 100 | Tablettose® 70 | Granulated<br>sugar N°1 600 | GLUCIDEX® 19 |
|---------|---------------------------|------------------------|-------------------|--------------|----------------|-----------------------------|--------------|
| 10      | 7.2 (0.89)                | 21.5 (2.61)            | 30.1 (4.67)       | 8.7 (1.77)   | 27.1 (2.62)    | 3.3 (0.3)                   | 3.7 (0.71)   |
| 20      | 10.4 (0.92)               | 26.5 (2.33)            | 34.4 (4.84)       | 11.8 (1.96)  | 32 (2.15)      | 5.4 (0.39)                  | 5.6 (0.78)   |
| 30      | 13 (0.94)                 | 30 (2.26)              | 37.2 (4.91)       | 14 (2.06)    | 35.6 (2.03)    | 7.2 (0.43)                  | 7.2 (0.84)   |
| 45      | 16.6 (0.99)               | 34 (2.31)              | 40.6 (4.91)       | 16.9 (2.22)  | 39.8 (1.77)    | 9.6 (0.53)                  | 9.2 (0.87)   |
| 60      | 19.7 (1.18)               | 37.3 (2.41)            | 43.6 (4.87)       | 19.5 (2.32)  | 43.1 (1.54)    | 12 (0.57)                   | 11.3 (0.88)  |
| 90      | 25.1 (1.5)                | 43 (2.43)              | 48.8 (4.44)       | 24.1 (2.38)  | 48.8 (1.16)    | 16.4 (0.78)                 | 15.4 (0.98)  |
| 120     | 29.7 (1.73)               | 47.9 (2.37)            | 53.4 (3.92)       | 28.3 (2.35)  | 53.4 (0.84)    | 20.7 (0.93)                 | 19.2 (1.08)  |
| 150     | 33.9 (1.96)               | 52.2 (2.3)             | 57.2 (3.76)       | 32.2 (2.27)  | 57.4 (0.57)    | 24.8 (1.08)                 | 22.8 (1.16)  |
| 180     | 37.9 (2.12)               | 56.1 (2.29)            | 60.6 (3.75)       | 36 (2.25)    | 61 (0.69)      | 28.7 (1.16)                 | 26.3 (1.26)  |
| 210     | 41.7 (2.28)               | 59.7 (2.33)            | 63.7 (3.71)       | 39.7 (2.25)  | 64.2 (0.67)    | 32.3 (1.23)                 | 29.9 (1.34)  |
| 240     | 45.5 (2.29)               | 63 (2.28)              | 66.6 (3.54)       | 43.1 (2.25)  | 67.2 (0.75)    | 35.9 (1.35)                 | 33.3 (1.41)  |
| 270     | 49.1 (2.15)               | 66.1 (2.35)            | 69.3 (3.39)       | 46.6 (2.28)  | 70 (0.79)      | 39.3 (1.43)                 | 36.8 (1.47)  |
| 300     | 52.6 (2.11)               | 69.1 (2.38)            | 72 (3.23)         | 50 (2.27)    | 72.7 (0.87)    | 42.7 (1.52)                 | 40.1 (1.49)  |
| 330     | 55.9 (1.99)               | 71.9 (2.37)            | 74.5 (3.04)       | 53.1 (2.19)  | 75.4 (0.94)    | 45.9 (1.6)                  | 43.4 (1.54)  |
| 360     | 59.1 (1.94)               | 74.6 (2.48)            | 77 (2.81)         | 56.3 (2.22)  | 77.9 (0.94)    | 49 (1.68)                   | 46.7 (1.61)  |
| 420     | 65.1 (2.03)               | 79.7 (2.51)            | 81.6 (2.9)        | 62.3 (2.31)  | 82.5 (0.7)     | 54.8 (1.88)                 | 52.9 (1.68)  |
| 480     | 70.7 (2.08)               | 84.4 (2.56)            | 86 (3.01)         | 68 (2.23)    | 87.5 (2.24)    | 60.3 (2)                    | 60.8 (5.24)  |
| 540     | 76.3 (2.27)               | 88.5 (2.44)            | 90.7 (4.05)       | 73.3 (2.13)  | 92.7 (3.32)    | 65.3 (2.2)                  | 67.1 (5.03)  |
| 600     | 84.3 (5.79)               | 93.2 (2.61)            | 94.7 (3.51)       | 80.2 (4.88)  | 95.6 (2.39)    | 70 (2.36)                   | 72.7 (4.91)  |
| 660     | 90.8 (8.07)               | 98.6 (2.96)            | 97.7 (1.93)       | 86.9 (5.49)  | 97 (1.61)      | 74.2 (2.55)                 | 77.6 (4.75)  |
| 720     | 94.8 (7.39)               | 101.4 (1.23)           | 99.5 (0.61)       | 93 (3.34)    | 97.3 (1.32)    | 77.9 (2.68)                 | 81.8 (4.63)  |
| 780     | 98 (4.96)                 | 101.8 (1.2)            | 100 (0.34)        | 97.2 (1.89)  | 97.2 (1.37)    | 81.2 (2.72)                 | 85.4 (4.49)  |
| 840     | 100.3 (3.28)              | 101.9 (1.24)           | 100.1 (0.25)      | 98.9 (1.43)  | 97.2 (1.37)    | 84 (2.7)                    | 88.4 (4.35)  |
| 900     | 101.8 (1.87)              | 101.8 (1.27)           | 100 (0.24)        | 99.6 (1.27)  | 97.2 (1.45)    | 86.2 (2.62)                 | 91.1 (4.2)   |
| 960     | 102.7 (1.58)              | 101.8 (1.27)           | 100 (0.24)        | 99.8 (1.26)  | 97.1 (1.45)    | 88.1 (2.71)                 | 93.3 (4.04)  |
| 1020    | 103.1 (1.9)               | 101.7 (1.36)           | 100 (0.34)        | 99.8 (1.3)   | 97.2 (1.46)    | 89.7 (2.79)                 | 95.2 (3.82)  |

---

|      |              |              |             |             |             |             |              |
|------|--------------|--------------|-------------|-------------|-------------|-------------|--------------|
| 1080 | 103.2 (1.99) | 101.7 (1.41) | 99.9 (0.37) | 99.7 (1.27) | 97.3 (1.33) | 90.8 (2.74) | 96.7 (3.51)  |
| 1140 | 103.2 (2.01) | 101.7 (1.45) | 99.9 (0.41) | 99.7 (1.29) | 97.2 (1.37) | 91.7 (2.61) | 98 (3.17)    |
| 1200 | 103.2 (2.01) | 101.7 (1.52) | 99.9 (0.41) | 99.7 (1.36) | 97.4 (1.33) | 92.3 (2.43) | 99 (2.75)    |
| 1260 | 103.2 (2.03) | 101.6 (1.56) | 99.8 (0.42) | 99.6 (1.35) | 97.2 (1.42) | 92.8 (2.32) | 99.9 (2.33)  |
| 1320 | 103.1 (2.05) | 101.6 (1.63) | 99.6 (0.49) | 99.4 (1.42) | 97.3 (1.3)  | 93.1 (2.3)  | 100.5 (1.9)  |
| 1380 | 103.2 (2.06) | 101.6 (1.62) | 99.6 (0.5)  | 99.4 (1.42) | 97.3 (1.36) | 93.4 (2.22) | 100.9 (1.67) |
| 1440 | 103.4 (2.08) | 101.7 (1.69) | 99.6 (0.48) | 99.3 (1.47) | 97.1 (1.44) | 93.5 (2.25) | 101.1 (1.56) |

---

**Table S3.** Experimental results of carvedilol release. Data is shown for DCP, pregelatinized starch, MCC and EC. The results given are mean values with corresponding standard deviations shown in parentheses (n = 4).

| t [min] | DI-CAFOS®<br>A12 | EMCOMPRESS<br>® Anhydrous | STARCH 1500®<br>↓PS | STARCH 1500®<br>↑PS | AVICEL® PH-<br>102 | AVICEL® PH-<br>200 | ETHOCEL™<br>Standard 20<br>Premium |
|---------|------------------|---------------------------|---------------------|---------------------|--------------------|--------------------|------------------------------------|
| 10      | 3.8 (0.12)       | 7 (0.41)                  | 9.7 (2.34)          | 5.9 (0.42)          | 2 (0.74)           | 2.3 (0.19)         | 1.9 (0.17)                         |
| 20      | 5.7 (0.15)       | 9.4 (0.54)                | 12 (2.89)           | 7.6 (0.5)           | 3.7 (0.76)         | 4 (0.38)           | 3.5 (0.25)                         |
| 30      | 7.1 (0.24)       | 11.1 (0.57)               | 13.4 (2.9)          | 8.9 (0.54)          | 4.9 (0.88)         | 5.3 (0.54)         | 4.8 (0.29)                         |
| 45      | 9.2 (0.33)       | 13.2 (0.6)                | 15.1 (2.96)         | 10.6 (0.57)         | 6.7 (0.96)         | 7.1 (0.66)         | 6.4 (0.42)                         |
| 60      | 10.9 (0.44)      | 15 (0.65)                 | 16.6 (2.93)         | 12 (0.62)           | 8.1 (1.08)         | 8.8 (0.79)         | 7.8 (0.46)                         |
| 90      | 14.2 (0.57)      | 18.1 (0.78)               | 19.1 (2.9)          | 14.6 (0.66)         | 10.8 (1.17)        | 11.8 (0.88)        | 10.6 (0.61)                        |
| 120     | 17.1 (0.74)      | 20.9 (1)                  | 21.3 (2.99)         | 16.8 (0.72)         | 13.2 (1.18)        | 14.5 (0.88)        | 13.3 (0.73)                        |
| 150     | 19.9 (0.89)      | 23.5 (1.28)               | 23.4 (2.93)         | 18.8 (0.75)         | 15.4 (1.21)        | 17 (0.88)          | 15.8 (0.75)                        |
| 180     | 22.6 (1.1)       | 25.9 (1.48)               | 25.1 (2.92)         | 20.7 (0.83)         | 17.5 (1.21)        | 19.3 (0.88)        | 18.3 (0.84)                        |
| 210     | 25.1 (1.27)      | 28.2 (1.71)               | 26.9 (2.93)         | 22.5 (0.93)         | 19.4 (1.17)        | 21.6 (0.85)        | 20.7 (0.85)                        |
| 240     | 27.7 (1.47)      | 30.5 (1.96)               | 28.6 (2.87)         | 24.2 (1.09)         | 21.3 (1.17)        | 23.8 (0.86)        | 23 (0.83)                          |
| 270     | 30 (1.63)        | 32.7 (2.22)               | 30.1 (2.91)         | 25.8 (1.2)          | 23.1 (1.16)        | 25.9 (0.86)        | 25.3 (0.86)                        |
| 300     | 32.4 (1.79)      | 34.8 (2.44)               | 31.8 (2.95)         | 27.3 (1.3)          | 24.9 (1.21)        | 28 (0.86)          | 27.5 (0.85)                        |
| 330     | 34.7 (1.94)      | 36.9 (2.67)               | 33.3 (2.92)         | 28.8 (1.41)         | 26.8 (1.21)        | 29.9 (0.91)        | 29.7 (0.83)                        |
| 360     | 37 (2.14)        | 38.9 (2.9)                | 34.7 (2.98)         | 30.4 (1.52)         | 28.5 (1.19)        | 31.9 (0.93)        | 31.8 (0.79)                        |
| 420     | 41.4 (2.42)      | 42.8 (3.36)               | 37.7 (3.08)         | 33.3 (1.74)         | 32.2 (1.23)        | 35.8 (1.06)        | 35.9 (0.78)                        |
| 480     | 45.6 (2.8)       | 46.5 (3.86)               | 40.5 (3.21)         | 36.2 (1.97)         | 35.7 (1.28)        | 39.4 (1.27)        | 39.9 (0.85)                        |
| 540     | 49.6 (3.1)       | 50 (4.34)                 | 43.3 (3.35)         | 39.1 (2.19)         | 39.2 (1.32)        | 43 (1.47)          | 43.7 (0.99)                        |
| 600     | 53.5 (3.43)      | 53.3 (4.77)               | 46.1 (3.44)         | 42 (2.39)           | 42.5 (1.42)        | 46.5 (1.66)        | 47.3 (1.14)                        |
| 660     | 57.2 (3.72)      | 56.4 (5.07)               | 48.8 (3.57)         | 44.8 (2.55)         | 45.8 (1.53)        | 49.9 (1.91)        | 50.6 (1.28)                        |
| 720     | 60.8 (4.02)      | 59.2 (5.31)               | 51.5 (3.69)         | 47.6 (2.76)         | 49 (1.6)           | 53.1 (2.08)        | 53.9 (1.46)                        |
| 780     | 64.3 (4.27)      | 61.9 (5.52)               | 54.1 (3.78)         | 50.4 (2.95)         | 51.9 (1.62)        | 56.1 (2.29)        | 57 (1.61)                          |
| 840     | 67.6 (4.52)      | 64.6 (5.87)               | 56.7 (3.86)         | 53.2 (3.07)         | 54.8 (1.76)        | 59.2 (2.45)        | 59.9 (1.85)                        |
| 900     | 70.9 (4.73)      | 67.2 (6.23)               | 59.2 (4.04)         | 55.9 (3.23)         | 57.6 (1.85)        | 62.2 (2.58)        | 62.7 (2.09)                        |
| 960     | 74 (4.99)        | 69.7 (6.49)               | 61.7 (4.08)         | 58.5 (3.35)         | 60.3 (1.94)        | 65.1 (2.68)        | 65.3 (2.27)                        |
| 1020    | 77 (5.09)        | 72.1 (6.75)               | 64.2 (4.13)         | 61.1 (3.45)         | 62.9 (2.12)        | 67.9 (2.74)        | 67.8 (2.48)                        |

---

|      |             |             |             |             |             |             |             |
|------|-------------|-------------|-------------|-------------|-------------|-------------|-------------|
| 1080 | 79.8 (5.17) | 74.4 (6.85) | 66.5 (4.18) | 63.6 (3.58) | 65.4 (2.31) | 70.7 (2.83) | 70.2 (2.78) |
| 1140 | 82.4 (5.13) | 76.6 (6.85) | 68.8 (4.23) | 66 (3.6)    | 67.9 (2.34) | 73.3 (2.95) | 72.4 (3)    |
| 1200 | 84.8 (5.06) | 78.6 (6.78) | 71 (4.29)   | 68.4 (3.64) | 70.2 (2.28) | 75.7 (2.99) | 74.6 (3.16) |
| 1260 | 87 (5)      | 80.4 (6.85) | 73.2 (4.34) | 70.8 (3.77) | 72.5 (2.3)  | 78 (3.03)   | 76.6 (3.37) |
| 1320 | 89 (4.88)   | 82.1 (6.92) | 75.3 (4.32) | 73 (3.76)   | 74.6 (2.25) | 80.1 (3.12) | 78.4 (3.49) |
| 1380 | 90.8 (4.72) | 83.5 (7.01) | 77.4 (4.31) | 75.1 (3.83) | 76.7 (2.16) | 82.2 (3.25) | 80.3 (3.57) |
| 1440 | 92.4 (4.6)  | 84.9 (7)    | 79.3 (4.3)  | 77.1 (3.87) | 78.7 (2.07) | 83.9 (3.27) | 82 (3.73)   |

---

**Table S4.** RSQ results of LOESS models for individual tested tablets.

|                                                          | RSQs of LOESS models<br>of carvedilol release<br>results for tablet 1 of 4 | RSQs of LOESS models<br>of carvedilol release<br>results for tablet 2 of 4 | RSQs of LOESS models<br>of carvedilol release<br>results for tablet 3 of 4 | RSQs of LOESS models<br>of carvedilol release<br>results for tablet 4 of 4 |
|----------------------------------------------------------|----------------------------------------------------------------------------|----------------------------------------------------------------------------|----------------------------------------------------------------------------|----------------------------------------------------------------------------|
| Polyglykol® 4000 P                                       | 0.999038083                                                                | 0.997826745                                                                | 0.999247685                                                                | 0.998265217                                                                |
| Polyglykol® 8000 P                                       | 0.998640295                                                                | 0.998406944                                                                | 0.9988345                                                                  | 0.998604489                                                                |
| POLYOX™ WSR N-80 (LEO NF Grade)                          | 0.999885176                                                                | 0.999938454                                                                | 0.999906771                                                                | 0.999907963                                                                |
| KOLLIDON® 25                                             | 0.999765367                                                                | 0.998975066                                                                | 0.999458932                                                                | 0.998717628                                                                |
| KOLLIDON® 90 F                                           | 0.999978743                                                                | 0.999976363                                                                | 0.99995287                                                                 | 0.999951725                                                                |
| C*Pharm Mannidex 16700                                   | 0.999949674                                                                | 0.999935552                                                                | 0.999868613                                                                | 0.994643682                                                                |
| PEARLITOL® 160C                                          | 0.999934256                                                                | 0.999918568                                                                | 0.999147116                                                                | 0.999958689                                                                |
| Pardeck® M 100                                           | 0.996618012                                                                | 0.997573979                                                                | 0.999355216                                                                | 0.993537404                                                                |
| Pardeck® M 200                                           | 0.999256112                                                                | 0.996787743                                                                | 0.999245382                                                                | 0.999836075                                                                |
| Lactochem® Fine Powder                                   | 0.999871901                                                                | 0.999985757                                                                | 0.999953613                                                                | 0.999845799                                                                |
| Lactochem® Crystals                                      | 0.999865964                                                                | 0.999923965                                                                | 0.999899913                                                                | 0.999773615                                                                |
| SuperTab® 11SD                                           | 0.999811004                                                                | 0.999919998                                                                | 0.999936925                                                                | 0.999940946                                                                |
| FlowLac® 100                                             | 0.999972979                                                                | 0.999929325                                                                | 0.99980934                                                                 | 0.999934854                                                                |
| Tabletose® 70                                            | 0.999893668                                                                | 0.999938821                                                                | 0.999902769                                                                | 0.999742256                                                                |
| Granulated sugar N°1 600                                 | 0.999996352                                                                | 0.999995209                                                                | 0.999996771                                                                | 0.999995688                                                                |
| GLUCIDEX® 19                                             | 0.999993076                                                                | 0.999977473                                                                | 0.999996493                                                                | 0.999844563                                                                |
| DI-CAFOS® A12                                            | 0.999997634                                                                | 0.999996272                                                                | 0.999996698                                                                | 0.999996746                                                                |
| EMCOMPRESS® Anhydrous                                    | 0.999989571                                                                | 0.999988076                                                                | 0.999985597                                                                | 0.999991268                                                                |
| STARCH 1500® ↓PS                                         | 0.999989263                                                                | 0.999986324                                                                | 0.99994923                                                                 | 0.999986844                                                                |
| STARCH 1500® ↑PS                                         | 0.999993686                                                                | 0.99999496                                                                 | 0.999994487                                                                | 0.999993311                                                                |
| AVICEL® PH-102                                           | 0.999994083                                                                | 0.999990994                                                                | 0.999995144                                                                | 0.999994623                                                                |
| AVICEL® PH-200                                           | 0.999992457                                                                | 0.999998194                                                                | 0.999995874                                                                | 0.999998155                                                                |
| ETHOCEL™ Standard 20 Premium                             | 0.999996505                                                                | 0.999995186                                                                | 0.999996924                                                                | 0.99999667                                                                 |
| MIN = 0.993537404; MAX = 0.999998194; MEAN = 0.999546401 |                                                                            |                                                                            |                                                                            |                                                                            |

**Table S5.** LOESS estimated times at which 0 %, 5 %, 10 %, ..., 95 % of carvedilol is released. Data is shown for PEG/PEO, PVP and mannitol groups. The results given are mean values with corresponding standard deviations shown in parentheses (n = 4).

| T <sub>X%</sub> , LOESS<br>(min)   | Polyglykol® 4000 | Polyglykol® 8000 | POLYOX™ WSR<br>N-80 (LEO NF<br>Grade) | KOLLIDON® 25  | KOLLIDON® 90<br>F | C*Pharm<br>Mannidex 16700 | PEARLITOL®<br>160C | Parateck® M 100 | Parateck® M 200 |
|------------------------------------|------------------|------------------|---------------------------------------|---------------|-------------------|---------------------------|--------------------|-----------------|-----------------|
|                                    | P                | P                |                                       |               |                   |                           |                    |                 |                 |
| T <sub>0%</sub> , T <sub>lag</sub> | <sup>a</sup>     | 1.3 (0.7)        | 6.7 (0.6)                             | <sup>a</sup>  | 3.8 (0.2)         | <sup>a</sup>              | <sup>a</sup>       | 6.5 (1.9)       | 4.2 (2.2)       |
| T <sub>5%</sub>                    | <sup>a</sup>     | 4.5 (0.7)        | 17.7 (2.1)                            | <sup>a</sup>  | 29.4 (5.9)        | 2.3 (2.4)                 | <sup>a</sup>       | 10.2 (0.9)      | 8.8 (0.6)       |
| T <sub>10%</sub>                   | 3.9 (0.7)        | 7.7 (0.8)        | 28.4 (3.5)                            | 7.3 (2.6)     | 53.3 (10.4)       | 11.1 (1.2)                | 8.4 (1.8)          | 13.9 (0.8)      | 13.5 (1.1)      |
| T <sub>15%</sub>                   | 7.5 (0.6)        | 10.9 (0.8)       | 38.1 (3.5)                            | 12 (2.8)      | 75.1 (14.3)       | 20 (3.4)                  | 17.9 (2.1)         | 17.6 (1.8)      | 18.1 (2.6)      |
| T <sub>20%</sub>                   | 11.1 (0.7)       | 14.2 (0.9)       | 47.2 (3.7)                            | 16.7 (3.4)    | 96.1 (18.2)       | 28.9 (6.3)                | 27.5 (2.5)         | 21.3 (2.9)      | 22.8 (4.2)      |
| T <sub>25%</sub>                   | 14.8 (1.1)       | 17.5 (0.9)       | 56.1 (3.7)                            | 21.6 (4.4)    | 116.4 (21.4)      | 38.8 (10.2)               | 37.7 (3.6)         | 25 (4.1)        | 27.4 (5.8)      |
| T <sub>30%</sub>                   | 18.5 (1.5)       | 20.8 (1)         | 65.7 (3.2)                            | 26.5 (5.6)    | 136.5 (24.5)      | 49.7 (14.7)               | 47.9 (6)           | 28.8 (5.4)      | 31.8 (6.9)      |
| T <sub>35%</sub>                   | 22.2 (2)         | 24.1 (1.1)       | 75.2 (3.2)                            | 32.5 (8)      | 156.1 (26.9)      | 61.7 (19.9)               | 58.7 (9.3)         | 32.5 (6.5)      | 36.2 (8.1)      |
| T <sub>40%</sub>                   | 26 (2.5)         | 27.4 (1.1)       | 85.7 (3.6)                            | 40.3 (12.8)   | 176 (29)          | 73.9 (25.8)               | 69.6 (12.9)        | 36.1 (7.6)      | 40.8 (9.4)      |
| T <sub>45%</sub>                   | 29.8 (3)         | 30.8 (1.2)       | 95.8 (3.7)                            | 51.4 (21.8)   | 196.2 (31.4)      | 86.1 (31.5)               | 80.3 (17.3)        | 39.7 (8.8)      | 45.2 (10.7)     |
| T <sub>50%</sub>                   | 33.9 (3.9)       | 34.2 (1.4)       | 107.1 (5)                             | 64.7 (32.7)   | 217.2 (33.4)      | 98.5 (37.5)               | 91.5 (22.2)        | 43.4 (10)       | 51 (13.4)       |
| T <sub>55%</sub>                   | 38.6 (5.3)       | 38.4 (1.8)       | 118.7 (5.7)                           | 79.8 (45.3)   | 239.4 (35.3)      | 110.8 (43.8)              | 103.1 (27.6)       | 47.5 (11.3)     | 56.8 (16.2)     |
| T <sub>60%</sub>                   | 43.6 (6.3)       | 43 (1.7)         | 131.5 (7.6)                           | 95.8 (58.9)   | 263.2 (37.5)      | 123.3 (50.4)              | 115.3 (33)         | 53 (13.3)       | 63.4 (18.9)     |
| T <sub>65%</sub>                   | 48.8 (7.1)       | 47.5 (1.6)       | 144.8 (8.6)                           | 112.2 (73.2)  | 289.2 (39.9)      | 138.3 (53.5)              | 128.3 (38.9)       | 58.2 (14.6)     | 71.7 (22.6)     |
| T <sub>70%</sub>                   | 56.2 (10.6)      | 52 (1.6)         | 159.4 (11.4)                          | 129.2 (87.9)  | 317.9 (42.1)      | 153.6 (58.3)              | 143.8 (44.4)       | 63.2 (16.1)     | 79.9 (27.1)     |
| T <sub>75%</sub>                   | 62.9 (13.2)      | 57.9 (3)         | 175.8 (12.9)                          | 147.4 (103.1) | 349.4 (43.6)      | 172.2 (60.1)              | 159.3 (51.5)       | 71.4 (20.8)     | 89.3 (32.9)     |
| T <sub>80%</sub>                   | 74.4 (18.9)      | 67 (1.1)         | 193 (15.4)                            | 169.1 (118.2) | 383 (45.7)        | 192.1 (62.8)              | 177.8 (60)         | 80.3 (21)       | 101.8 (39.5)    |
| T <sub>85%</sub>                   | 88.7 (25.1)      | 74.3 (0.6)       | 213.6 (17)                            | 191.8 (136.8) | 422.8 (47.1)      | 217 (65.9)                | 200.4 (68)         | 93.8 (24)       | 117.7 (46.1)    |
| T <sub>90%</sub>                   | 122.8 (50.3)     | 91.2 (1.7)       | 237.5 (19)                            | 224.1 (155.3) | 471.1 (51.1)      | 248.1 (71.4)              | 227.2 (80.5)       | 110.6 (29.6)    | 136.2 (54.6)    |
| T <sub>95%</sub>                   | 195.2 (105.3)    | 114.6 (11.6)     | 272.2 (20.9)                          | 266.9 (181.7) | 534.9 (60.1)      | 289.6 (82.5)              | 262.1 (94.3)       | 135.4 (35.8)    | 162.5 (60.2)    |

<sup>a</sup> an ongoing burst release stage for at least one of the tested tablets (n = 4).



**Table S6.** LOESS estimated times at which 0 %, 5 %, 10 %, ..., 95 % of carvedilol is released. Data is shown for the lactose group, sucrose and maltodextrin. The results given are mean values with corresponding standard deviations shown in parentheses (n = 4).

| T <sub>X</sub> %,<br>(min)         | LOESS Lactochem®<br>Powder | Fine Lactochem®<br>Crystals | SuperTab® 11SD | FlowLac® 100   | Tablettose® 70 | Granulated sugar<br>N°1 600 | GLUCIDEX® 19   |
|------------------------------------|----------------------------|-----------------------------|----------------|----------------|----------------|-----------------------------|----------------|
| T <sub>0</sub> %, T <sub>lag</sub> | a                          | a                           | a              | a              | a              | a                           | a              |
| T <sub>5</sub> %                   | a                          | a                           | a              | a              | a              | 18.4 (2)                    | 17.3 (4.5)     |
| T <sub>10</sub> %                  | 19.4 (3.4)                 | a                           | a              | 14.4 (7.1)     | a              | 47.6 (3.3)                  | 50.6 (6)       |
| T <sub>15</sub> %                  | 38.8 (4.4)                 | a                           | a              | 36.5 (9.5)     | a              | 80.8 (5)                    | 87.6 (7.1)     |
| T <sub>20</sub> %                  | 62.4 (6.7)                 | a                           | a              | 64.7 (13.6)    | a              | 115.7 (6.5)                 | 127 (9)        |
| T <sub>25</sub> %                  | 91.2 (8.9)                 | 17.6 (6.5)                  | a              | 97.4 (16)      | a              | 152.4 (8.2)                 | 168.7 (10.3)   |
| T <sub>30</sub> %                  | 123.4 (12)                 | 31.9 (7.4)                  | a              | 133.6 (17.1)   | 17 (6.3)       | 191.4 (9.6)                 | 211.5 (11.4)   |
| T <sub>35</sub> %                  | 159.2 (14.7)               | 50.8 (10.2)                 | 24.9 (16.3)    | 172.3 (17.9)   | 29.6 (5.9)     | 232.9 (11.1)                | 254.8 (12.5)   |
| T <sub>40</sub> %                  | 197.1 (16.8)               | 75 (12.7)                   | 45.1 (20.6)    | 213.5 (18.9)   | 46.8 (6.7)     | 276.6 (12.9)                | 299.4 (13.4)   |
| T <sub>45</sub> %                  | 236.5 (17.5)               | 103.3 (14.4)                | 69 (25.7)      | 256.5 (19.8)   | 70.3 (7.1)     | 322.4 (14.7)                | 345 (14.5)     |
| T <sub>50</sub> %                  | 278 (17.6)                 | 135.8 (16.5)                | 98.3 (28.1)    | 301 (20.7)     | 98.6 (6.4)     | 371.6 (17.5)                | 392.4 (15.7)   |
| T <sub>55</sub> %                  | 322.1 (18)                 | 172.5 (18.4)                | 133.9 (31.1)   | 348 (21.5)     | 132.9 (5.2)    | 424 (20)                    | 437.8 (22.5)   |
| T <sub>60</sub> %                  | 369.9 (19)                 | 213.8 (20.2)                | 176.5 (34.2)   | 397.7 (22.7)   | 172.7 (4.8)    | 479.6 (23.4)                | 482.3 (31.3)   |
| T <sub>65</sub> %                  | 420.4 (20.4)               | 260 (22.5)                  | 223.9 (37.3)   | 449.5 (23.7)   | 218.6 (6.8)    | 539.2 (27.2)                | 528.2 (40.2)   |
| T <sub>70</sub> %                  | 473 (22.1)                 | 310.6 (24.8)                | 276.6 (37.5)   | 503.2 (24)     | 270.1 (8.5)    | 603.9 (32.8)                | 577.2 (48.8)   |
| T <sub>75</sub> %                  | 524.9 (26.7)               | 366.1 (28.3)                | 335.4 (37.1)   | 554.4 (28.3)   | 326.2 (10.7)   | 677.1 (41)                  | 632 (59)       |
| T <sub>80</sub> %                  | 576.1 (39.6)               | 425.7 (32.2)                | 400.4 (38.1)   | 602.2 (33.1)   | 387.7 (10.5)   | 762.9 (51.7)                | 698.6 (65)     |
| T <sub>85</sub> %                  | 625.8 (57.9)               | 490.6 (35.3)                | 468 (41.6)     | 646.7 (38.4)   | 451.7 (14.9)   | 875.4 (70.6)                | 780 (74.2)     |
| T <sub>90</sub> %                  | 674.5 (75.1)               | 557 (34.2)                  | 534.9 (45.4)   | 692.2 (41.9)   | 516.6 (29.5)   | 1057.7 (113.9)              | 883 (89.2)     |
| T <sub>95</sub> %                  | 724.5 (90.2)               | 619.3 (30.6)                | 607.8 (49.9)   | 1238.4 (929.5) | 605 (60.2)     | > 1440                      | 1024.3 (117.9) |

<sup>a</sup> an ongoing burst release stage for at least one of the tested tablets (n = 4).

**Table S7.** LOESS estimated times at which 0 %, 5 %, 10 %, ..., 95 % of carvedilol is released. Data is shown for DCP, pregelatinized starch, MCC and EC. The results given are mean values with corresponding standard deviations shown in parentheses (n = 4).

| T <sub>X%</sub> ,<br>(min)         | LOESS<br>DI-CAFOS® A12 | EMCOMPRESS®<br>Anhydrous | STARCH<br>↓PS  | 1500®<br>STARCH<br>↑PS | 1500®<br>AVICEL® PH-102 | AVICEL® PH-200 | ETHOCEL™<br>Standard<br>Premium | 20 |
|------------------------------------|------------------------|--------------------------|----------------|------------------------|-------------------------|----------------|---------------------------------|----|
| T <sub>0%</sub> , T <sub>lag</sub> | a                      | a                        | a              | a                      | a                       | a              | a                               |    |
| T <sub>5%</sub>                    | 16.8 (0.9)             | a                        | a              | a                      | 31.7 (6.7)              | 28.6 (3.3)     | 32.7 (2.7)                      |    |
| T <sub>10%</sub>                   | 52.4 (3.1)             | 24.9 (2.9)               | a              | 40.2 (5.2)             | 82.1 (12.6)             | 72.9 (7.8)     | 84.1 (6.4)                      |    |
| T <sub>15%</sub>                   | 99.2 (6.4)             | 60.9 (5.9)               | 48.7 (22.9)    | 96.8 (8.7)             | 145.4 (16.5)            | 127 (10.3)     | 140.9 (8.6)                     |    |
| T <sub>20%</sub>                   | 152.1 (10.5)           | 111.6 (9.8)              | 104.7 (37.5)   | 169.9 (13.3)           | 220.1 (18.5)            | 189.2 (11.7)   | 201.7 (10.3)                    |    |
| T <sub>25%</sub>                   | 209.5 (15.3)           | 170.6 (16.1)             | 179.9 (47.4)   | 257.3 (21.4)           | 301.1 (19.4)            | 257.8 (12.5)   | 266.4 (11.2)                    |    |
| T <sub>30%</sub>                   | 270.7 (20.8)           | 235.8 (23.7)             | 268.1 (55.2)   | 355.2 (30.2)           | 383.9 (20)              | 331.7 (14)     | 334.3 (11.4)                    |    |
| T <sub>35%</sub>                   | 335.5 (26.7)           | 305.9 (32.5)             | 367.3 (61.5)   | 457.6 (39.2)           | 468.3 (21.6)            | 409.4 (16.8)   | 406.7 (12)                      |    |
| T <sub>40%</sub>                   | 403.8 (33.3)           | 381.7 (43)               | 472.3 (68.1)   | 561.7 (48.6)           | 555.8 (23.9)            | 490.8 (21.8)   | 482.8 (13.9)                    |    |
| T <sub>45%</sub>                   | 475.2 (40.4)           | 463.2 (56.2)             | 579.9 (74.5)   | 667.8 (57.2)           | 646.1 (27.2)            | 576 (27.7)     | 563.8 (17.6)                    |    |
| T <sub>50%</sub>                   | 549.8 (48.2)           | 550.7 (72.5)             | 690.1 (81.5)   | 774.9 (65.4)           | 742.3 (31.7)            | 665.5 (34.9)   | 650.7 (22.2)                    |    |
| T <sub>55%</sub>                   | 628.8 (57.2)           | 646.4 (92.4)             | 804.2 (89.7)   | 884.5 (74.3)           | 846.3 (37.8)            | 760.3 (43)     | 744.1 (28.1)                    |    |
| T <sub>60%</sub>                   | 711.9 (67)             | 750.5 (114.8)            | 922.2 (97)     | 998.5 (83)             | 956.8 (46.2)            | 858.9 (50.3)   | 845.6 (37)                      |    |
| T <sub>65%</sub>                   | 799.4 (77.8)           | 862.8 (132.8)            | 1045.5 (105.5) | 1117.9 (89.9)          | 1072.9 (53.7)           | 960.8 (57.2)   | 957.6 (48.9)                    |    |
| T <sub>70%</sub>                   | 892.1 (90.5)           | 982 (147.2)              | 1176.9 (115.7) | 1245.1 (98.4)          | 1195.5 (59.3)           | 1069.1 (65.9)  | 1082.6 (64)                     |    |
| T <sub>75%</sub>                   | 989.1 (104.6)          | 1116.1 (171.5)           | 1314.9 (123.4) | > 1440                 | 1331 (63.8)             | 1187.3 (79.5)  | 1222.4 (84.5)                   |    |
| T <sub>80%</sub>                   | 1093.6 (121.5)         | > 1440                   | > 1440         | > 1440                 | > 1440                  | > 1440         | > 1440                          |    |
| T <sub>85%</sub>                   | 1214 (141.6)           | > 1440                   | > 1440         | > 1440                 | > 1440                  | > 1440         | > 1440                          |    |
| T <sub>90%</sub>                   | > 1440                 | > 1440                   | > 1440         | > 1440                 | > 1440                  | > 1440         | > 1440                          |    |
| T <sub>95%</sub>                   | > 1440                 | > 1440                   | > 1440         | > 1440                 | > 1440                  | > 1440         | > 1440                          |    |

<sup>a</sup> an ongoing burst release stage for at least one of the tested tablets (n = 4).

**Table S8.** Observed similarity factors ( $f_2$ ) and bootstrapped ( $n = 5000$ ) lower bound 90 % confidence interval estimations of similarity factors (shown in parentheses) for carvedilol release from METHOCEL™ K15M Premium matrix tablets containing different selected excipients as carvedilol release modifiers. Data is separately shown for PEG/PEO, PVP and mannitol groups (a), lactose group, sucrose and maltodextrin (b) and finally for all of the insoluble selected excipients (c). Green colouration denominates ‘similar’ carvedilol release profiles according to the  $f_2$  metric, orange colouration denominates ‘partial similarity’ of carvedilol release profiles (only observed  $f_2$  is above 50.0).

a)

|          | PEG 8k      | PEO         | PVP K25     | PVP K90     | MAN_C_1     | MAN_C_2     | MAN_SD_1    | MAN_SD_2    |
|----------|-------------|-------------|-------------|-------------|-------------|-------------|-------------|-------------|
| PEG 4k   | 81.5 (70.3) | 36.9 (34.5) | 53.3 (41)   | 25.5 (23.6) | 41.7 (35.7) | 41.2 (37)   | 57.7 (52.4) | 58.1 (49.6) |
| PEG 8k   | /           | 36.1 (35.2) | 51.5 (38.3) | 24.7 (23.3) | 40.5 (35.2) | 40.5 (36.6) | 61.5 (54.4) | 59.2 (49.5) |
| PEO      | /           | /           | 45.7 (36.8) | 38 (34.8)   | 63.9 (51.1) | 56.8 (48.2) | 39 (35.3)   | 43.4 (37.6) |
| PVP K25  | /           | /           | /           | 30.9 (25.1) | 55.9 (41)   | 56.2 (43)   | 54.9 (40.8) | 61.2 (44.3) |
| PVP K90  | /           | /           | /           | /           | 36.3 (30.3) | 33.9 (29)   | 25.4 (23.3) | 27.5 (24.6) |
| MAN_C_1  | /           | /           | /           | /           | /           | 69.2 (50.5) | 43.8 (36.4) | 49.1 (39.2) |
| MAN_C_2  | /           | /           | /           | /           | /           | /           | 45.7 (38.6) | 50.4 (41.2) |
| MAN_SD_1 | /           | /           | /           | /           | /           | /           | /           | 73 (55)     |

b)

|          | LAC_M       | LAC_C       | LAC_SD_1    | LAC_SD_2    | LAC_AG      | SUC         | MD_SD       |
|----------|-------------|-------------|-------------|-------------|-------------|-------------|-------------|
| PEG 4k   | 24.1 (22.9) | 33.4 (31.4) | 36.5 (33.9) | 23.5 (22.3) | 36.9 (34.9) | 20.2 (19.2) | 19.8 (18.8) |
| PEG 8k   | 23.3 (22.8) | 32 (30.9)   | 34.7 (33)   | 22.7 (22)   | 35.1 (34.6) | 19.4 (18.9) | 19 (18.6)   |
| PEO      | 31.9 (30.8) | 41.5 (40.2) | 41.5 (40.7) | 30.6 (29.5) | 42.7 (41.7) | 26.1 (25.3) | 25.7 (24.9) |
| PVP K25  | 28.4 (23)   | 40.4 (31.9) | 43.5 (34.9) | 27.3 (22.4) | 43.7 (34.1) | 22.7 (18.8) | 22.6 (18.7) |
| PVP K90  | 51.1 (46.6) | 46.1 (43.2) | 40.8 (37.6) | 48.1 (44.2) | 41.3 (38.9) | 38.7 (36.1) | 39.3 (36.2) |
| MAN_C_1  | 31.4 (27.7) | 43.8 (37.7) | 45.3 (40.1) | 30.1 (26.3) | 46.3 (40.7) | 25.1 (22.2) | 24.9 (22)   |
| MAN_C_2  | 29.5 (26.1) | 40.4 (35.4) | 41.7 (36.8) | 28.1 (24.9) | 41.9 (37)   | 23.3 (20.8) | 23.3 (20.7) |
| MAN_SD_1 | 23.3 (22.1) | 31.8 (30)   | 33.9 (31.9) | 22.5 (21.3) | 34.2 (32.4) | 19 (18)     | 18.8 (17.8) |
| MAN_SD_2 | 25.1 (23.3) | 34.5 (31.8) | 36.8 (33.8) | 24.3 (22.5) | 37.2 (34.6) | 20.6 (19.1) | 20.3 (18.9) |
| LAC_M    | /           | 45.4 (42.8) | 40.1 (37.3) | 77.6 (68.2) | 39.9 (38.8) | 47.7 (44.5) | 51.1 (47)   |
| LAC_C    | /           | /           | 70.1 (60.4) | 43.3 (40.7) | 67.1 (61.6) | 33.8 (32.3) | 34.1 (32.4) |
| LAC_SD_1 | /           | /           | /           | 38.8 (35.9) | 83.6 (73.4) | 31.3 (29.4) | 31.3 (29.3) |

|          |   |   |   |   |             |             |             |
|----------|---|---|---|---|-------------|-------------|-------------|
| LAC_SD_2 | / | / | / | / | 38.7 (37.3) | 52.4 (48.5) | 55.6 (50.7) |
| LAC_AG   | / | / | / | / | /           | 31.6 (30.8) | 31.4 (30.5) |
| SUC      | / | / | / | / | /           | /           | 69.1 (61.2) |

c)

|          | DCP_1       | DCP_2       | PS_1        | PS_2        | MCC 101     | MCC 200     | EC          |
|----------|-------------|-------------|-------------|-------------|-------------|-------------|-------------|
| PEG 4k   | 16.7 (15.8) | 17.3 (16.2) | 15.9 (14.8) | 14.3 (13.6) | 13.7 (13.1) | 14.8 (14.1) | 14.7 (14)   |
| PEG 8k   | 16.1 (15.4) | 16.6 (15.7) | 15.2 (14.3) | 13.7 (13.1) | 13.2 (12.7) | 14.2 (13.8) | 14.1 (13.7) |
| PEO      | 20.8 (19.9) | 21 (19.8)   | 18.9 (17.8) | 17.2 (16.5) | 16.8 (16.3) | 18.3 (17.7) | 18.2 (17.7) |
| PVP K25  | 18.3 (15.4) | 18.5 (15.7) | 16.7 (14.3) | 15 (12.8)   | 14.6 (12.5) | 15.9 (13.5) | 15.8 (13.4) |
| PVP K90  | 28.7 (26.7) | 28.1 (25.9) | 24.4 (22.8) | 22.5 (21.3) | 22.5 (21.5) | 24.6 (23.4) | 24.6 (23.5) |
| MAN_C_1  | 20 (17.8)   | 20.2 (17.9) | 18.1 (16.1) | 16.4 (14.8) | 16 (14.3)   | 17.4 (15.6) | 17.3 (15.5) |
| MAN_C_2  | 18.4 (16.4) | 18.5 (16.5) | 16.5 (14.7) | 14.9 (13.4) | 14.6 (13.1) | 16 (14.3)   | 15.8 (14.2) |
| MAN_SD_1 | 15.4 (14.5) | 15.8 (14.7) | 14.3 (13.3) | 12.8 (12.1) | 12.4 (11.8) | 13.5 (12.8) | 13.3 (12.7) |
| MAN_SD_2 | 16.7 (15.5) | 17.1 (15.8) | 15.5 (14.3) | 14 (13.1)   | 13.5 (12.7) | 14.7 (13.8) | 14.5 (13.7) |
| LAC_M    | 33.8 (31.4) | 32.5 (29.7) | 27.9 (26.1) | 25.6 (24.3) | 25.7 (24.6) | 28.3 (27)   | 28.2 (27)   |
| LAC_C    | 26.2 (24.7) | 26.1 (24.2) | 23.1 (21.6) | 20.9 (20)   | 20.6 (19.9) | 22.5 (21.7) | 22.4 (21.6) |
| LAC_SD_1 | 24.8 (23.2) | 25 (23.1)   | 22.3 (20.7) | 20.2 (19)   | 19.8 (18.7) | 21.5 (20.4) | 21.3 (20.2) |
| LAC_SD_2 | 36.2 (33.7) | 34.9 (31.9) | 29.8 (27.9) | 27.3 (26)   | 27.4 (26.4) | 30.3 (28.9) | 30.1 (28.9) |
| LAC_AG   | 25.1 (24)   | 25.4 (23.9) | 22.8 (21.4) | 20.6 (19.8) | 20.1 (19.6) | 21.9 (21.3) | 21.7 (21.2) |
| SUC      | 49.2 (44.6) | 46.1 (41)   | 38 (35.2)   | 34.8 (32.7) | 35.2 (33.4) | 39.5 (37.3) | 39.3 (37.1) |
| MD_SD    | 44.8 (40)   | 41.2 (36.5) | 34.5 (31.7) | 31.9 (29.5) | 32.5 (30.3) | 36.3 (33.6) | 36 (33.6)   |
| DCP_1    | /           | 69.2 (57.8) | 53.2 (47.2) | 48.7 (43.6) | 49.9 (45.1) | 59.7 (52.3) | 58.4 (51.7) |
| DCP_2    | /           | /           | 62.8 (51.5) | 53.6 (46.1) | 52.9 (46.1) | 62.4 (53.3) | 61.1 (52.7) |
| PS_1     | /           | /           | /           | 70.1 (58.7) | 62.9 (55.8) | 65.4 (60.5) | 64.3 (59.5) |
| PS_2     | /           | /           | /           | /           | 78.8 (72)   | 65.9 (58.2) | 66 (58.8)   |
| MCC 101  | /           | /           | /           | /           | /           | 70.9 (63.5) | 72.3 (64.7) |
| MCC 200  | /           | /           | /           | /           | /           | /           | 93.4 (79.4) |

**Table S9.** Particle size distribution results obtained using the laser diffraction method. The results of particle size distribution are given based on volume-weight diameter ( $D_{10}$ ,  $D_{50}$ ,  $D_{90}$ , mean- $D_{(4,3)}$ ).

| Ingredient name                                                       | $D_{(4,3)}$ ( $\mu\text{m}$ ) | $D_{10}$ ( $\mu\text{m}$ ) | $D_{50}$ ( $\mu\text{m}$ ) | $D_{90}$ ( $\mu\text{m}$ ) |
|-----------------------------------------------------------------------|-------------------------------|----------------------------|----------------------------|----------------------------|
| METHOCEL™ K15M Premium                                                | 92                            | 27                         | 75                         | 181                        |
| Carvedilol (free base)                                                | 37                            | 8                          | 30                         | 75                         |
| Magnesium stearate EUR PHAR                                           | 5                             | 2                          | 4                          | 10                         |
| Polyglykol® 4000 P                                                    | 340                           | 40                         | 327                        | 642                        |
| Polyglykol® 8000 P                                                    | 305                           | 47                         | 262                        | 625                        |
| POLYOX™ WSR N-80                                                      | 227                           | 63                         | 192                        | 441                        |
| KOLLIDON® 25                                                          | 68                            | 20                         | 60                         | 128                        |
| KOLLIDON® 90 F                                                        | 208                           | 85                         | 185                        | 363                        |
| C*Pharm Mannidex 16700                                                | 72                            | 9                          | 48                         | 172                        |
| PEARLITOL® 160C                                                       | 88                            | 8                          | 52                         | 224                        |
| Pardeck® M 100                                                        | 57                            | 13                         | 51                         | 108                        |
| Pardeck® M 200                                                        | 114                           | 20                         | 106                        | 216                        |
| Lactochem® Crystals                                                   | 146                           | 28                         | 138                        | 271                        |
| Lactochem® Fine Powder                                                | 54                            | 6                          | 35                         | 120                        |
| SuperTab® 11SD                                                        | 110                           | 38                         | 100                        | 195                        |
| FlowLac® 100                                                          | 106                           | 27                         | 94                         | 201                        |
| Tablettose® 70                                                        | 75                            | 13                         | 57                         | 164                        |
| Granulated sugar N°1 600                                              | 707                           | 326                        | 667                        | 1175                       |
| GLUCIDEX® 19                                                          | 130                           | 13                         | 112                        | 278                        |
| DI-CAFOS® A12                                                         | 12                            | 1                          | 10                         | 26                         |
| EMCOMPRESS® Anhydrous                                                 | 191                           | 60                         | 186                        | 322                        |
| AVICEL® PH-102                                                        | 126                           | 34                         | 113                        | 238                        |
| AVICEL® PH-200                                                        | 199                           | 56                         | 186                        | 356                        |
| ETHOCEL™ Standard 20 Premium                                          | 372                           | 124                        | 326                        | 694                        |
| STARCH 1500® QbD sample with smaller particle size ( $\downarrow$ PS) | 70                            | 13                         | 56                         | 154                        |
| STARCH 1500® QbD sample with larger particle size ( $\uparrow$ PS)    | 94                            | 16                         | 86                         | 185                        |

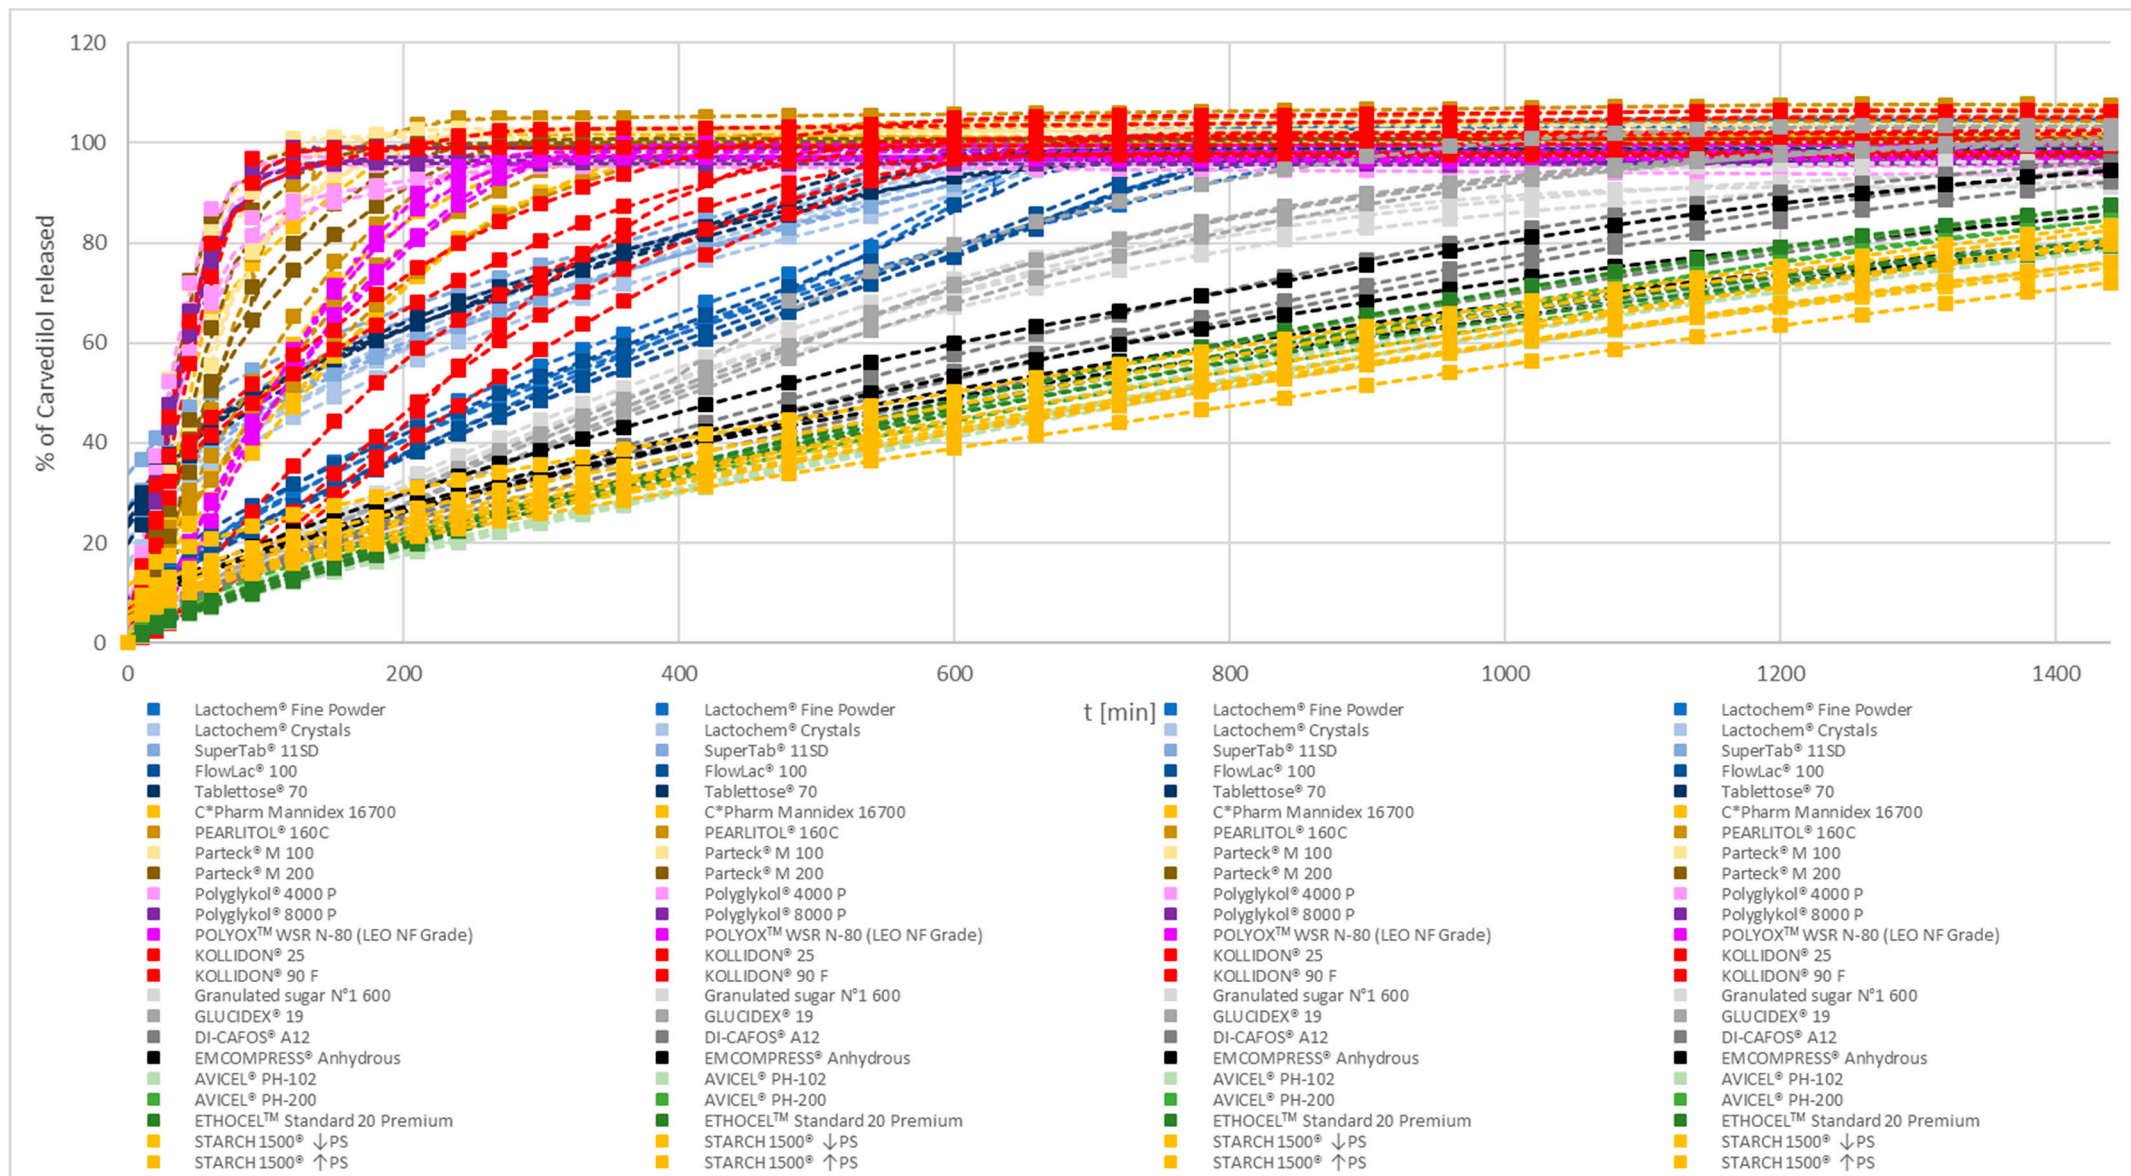

**Figure S1.** Comparison of carvedilol release from METHOCETM K15M Premium matrix tablets containing different selected excipients as carvedilol release modifiers. Points in the graph represent experimentally measured carvedilol release for individual tested tablets and dashed lines represent LOESS models with 1 min resolution.
